# Supplementary material
Source: PubMed Central journal article supplement (PMC6389434)
Supplement: NIHMS1512898-supplement-1.pdf [file NIHMS1512898-supplement-1.pdf]

**Table S1. Difference in select baseline characteristics between eligible vs. excluded patients.**

| Characteristics                                                   | All<br>(N= 716,758) | Eligible<br>(N = 439,461) | Excluded<br>(N = 277,297) | P-value<br>eligible vs.<br>excluded |
|-------------------------------------------------------------------|---------------------|---------------------------|---------------------------|-------------------------------------|
| Age at first ESRD service                                         | 76.0<br>(71.0,81.0) | 76.0 (72.0,81.0)          | 75.0 (70.0,80.0)          | <.0001                              |
| Female sex                                                        | 46.9                | 48.5                      | 44.4                      | <.0001                              |
| Race                                                              |                     |                           |                           | <.0001                              |
| White                                                             | 74.7                | 77.4                      | 70.4                      |                                     |
| Black                                                             | 20.5                | 19.1                      | 22.7                      |                                     |
| Asian                                                             | 3.7                 | 2.4                       | 5.6                       |                                     |
| other                                                             | 1.1                 | 1.1                       | 1.2                       |                                     |
| missing                                                           | 0.1                 | <0.1                      | 0.1                       |                                     |
| Hispanic ethnicity                                                | 9.2                 | 7.0                       | 12.7                      | <.0001                              |
| Diagnosed/reported comorbid conditions from Medical Evidence Form |                     |                           |                           |                                     |
| Current smoking                                                   | 3.2                 | 3.3                       | 3.2                       | 0.04                                |
| Alcohol dependence                                                | 0.7                 | 0.6                       | 0.7                       | <.0001                              |
| Drug dependence                                                   | 0.1                 | 0.1                       | 0.1                       | <.0001                              |
| Inability to ambulate or transfer                                 | 7.6                 | 7.7                       | 7.4                       | <.0001                              |
| Cause of end-stage renal disease                                  |                     |                           |                           | <.0001                              |
| Diabetes                                                          | 40.4                | 39.9                      | 41.1                      |                                     |
| Hypertension                                                      | 33.8                | 34.8                      | 32.4                      |                                     |
| Glomerulonephritis                                                | 5.4                 | 5.6                       | 5.1                       |                                     |
| Other                                                             | 19.1                | 19.5                      | 18.5                      |                                     |
| Missing                                                           | 1.2                 | 0.2                       | 2.9                       |                                     |
| First dialysis modality, PD                                       | 5.0                 | 5.4                       | 4.5                       | <.0001                              |
| Body mass index, kg/m <sup>2</sup>                                | 25.5<br>(22.2,29.7) | 25.5 (22.2,29.7)          | 25.6 (22.2,29.8)          | <.0001                              |
| % missing                                                         | 5.0                 | 4.0                       | 6.6                       |                                     |
| Serum albumin concentration, g/dl                                 | 3.2 (2.7,3.6)       | 3.2 (2.7,3.6)             | 3.2 (2.7,3.6)             | <.0001                              |
| % missing                                                         | 26.8                | 25.4                      | 28.8                      |                                     |
| Hemoglobin concentration, g/dl                                    | 10.0 (9.0,11.0)     | 10.0 (9.0,11.1)           | 10.0 (9.0,11.0)           | <.0001                              |
| % missing                                                         | 9.5                 | 8.2                       | 11.4                      |                                     |
| eGFR calculated, ml/min/1.73m <sup>2</sup>                        | 8.2 (5.9,11.3)      | 8.2 (5.9,11.3)            | 8.2 (5.9,11.3)            | <.0001                              |
| % missing                                                         | 3.2                 | 1.9                       | 5.2                       |                                     |

\*Median (interquartile range) for continuous measures, percentage for all other measures. AF – atrial fibrillation; eGFR – estimated glomerular filtration rate; ESRD – end-stage renal disease; HD – hemodialysis; PD – peritoneal dialysis.
