# Supplementary material
Source: PubMed Central journal article supplement (PMC6389434)
Supplement: NIHMS1512898-supplement-2.pdf [file NIHMS1512898-supplement-2.pdf]

**Table S2. Association of dialysis modality and incident AF over three years**

| Modality in the first 90 days | Person-years | N of incident AF | Incidence rate of AF, per 1000 person-years | Cause specific hazard model |              |              | Sub-distribution hazard model |              |              |
|-------------------------------|--------------|------------------|---------------------------------------------|-----------------------------|--------------|--------------|-------------------------------|--------------|--------------|
|                               |              |                  |                                             | HR (95 % CI)                | Model 1      | Model 2      | Model 3                       | Model 1      | Model 2      |
| HD                            | 380,164      | 65,829           | 173.2                                       | 1.0 (ref.)                  | 1.0 (ref.)   | 1.0 (ref.)   | 1.0 (ref.)                    | 1.0 (ref.)   | 1.0 (ref.)   |
|                               |              |                  |                                             | 0.86                        | 0.84         | 0.96         | 0.91                          | 0.88         | 0.92         |
| PD                            | 25,515       | 3876             | 152.0                                       | (0.84, 0.89)                | (0.81, 0.87) | (0.93, 0.99) | (0.88, 0.94)                  | (0.85, 0.91) | (0.89, 0.95) |

Model 1: unadjusted

Model 2: adjusting for age, sex, race/ethnicity

Model 3: adjusting for age, sex, race/ethnicity, cause of end-stage renal disease, current smoking, alcohol dependence, drug dependence, geographic region, inability to ambulate or transfer, count of pre-ESRD visits to nephrologist, Medicaid dual eligibility, body mass index, hemoglobin, albumin, estimated glomerular filtration rate at dialysis initiation, comorbidities (diabetes, hypertension, heart failure, cardiovascular disease, cerebral vascular disease, peripheral vascular disease, chronic obstructive pulmonary disease, cancer).

AF – atrial fibrillation; HD – hemodialysis; PD – peritoneal dialysis

Note: the proportionality assumption was found violated, thus leading to time stratification at 90 days from first dialysis.
