# Supplementary material
Source: PubMed Central journal article supplement (PMC6389434)
Supplement: NIHMS1512898-supplement-3.pdf [file NIHMS1512898-supplement-3.pdf]

**Table S3. Association of the first modality and incident AF from sub-distribution hazard model**

| Dialysis Modality                                                 | Sub-distribution hazard model |                   |                   |
|-------------------------------------------------------------------|-------------------------------|-------------------|-------------------|
|                                                                   | Model 1                       | Model 2           | Model 3           |
| <b>Incident AF during the first 90 days of dialysis</b>           |                               |                   |                   |
| HD                                                                | 1.0 (ref.)                    | 1.0 (ref.)        | 1.0 (ref.)        |
| PD                                                                | 0.57 (0.53, 0.61)             | 0.56 (0.52, 0.60) | 0.59 (0.55, 0.64) |
| <b>Incident AF from 91 days until 3 years from first dialysis</b> |                               |                   |                   |
| HD                                                                | 1.0 (ref.)                    | 1.0 (ref.)        | 1.0 (ref.)        |
| PD                                                                | 1.02 (0.98, 1.06)             | 0.98 (0.95, 1.02) | 1.05 (1.01, 1.09) |

Model 1: unadjusted

Model 2: adjusting for age, sex, race/ethnicity

Model 3: adjusting for age, sex, race/ethnicity, geographic region, cause of end-stage renal disease, current smoking, alcohol dependence, drug dependence, geographic region, inability to ambulate or transfer, count of pre-ESRD visits to nephrologist, Medicaid dual eligibility, body mass index, hemoglobin, albumin, estimated glomerular filtration rate at dialysis initiation, comorbidities (diabetes, hypertension, heart failure, cardiovascular disease, cerebral vascular disease, peripheral vascular disease, chronic obstructive pulmonary disease, cancer).

AF – atrial fibrillation; HD – hemodialysis; PD – peritoneal dialysis
