# Supplementary material
Source: PubMed Central journal article supplement (PMC6389434)
Supplement: NIHMS1512898-supplement-4.pdf [file NIHMS1512898-supplement-4.pdf]

**Table S4: Influence Analysis of Single Confounders Driving the Differences in Cause-specific Hazard Ratios Between Models 2 and 3**

| <i>Models, Model 2 + one covariate</i>        | Cause-specific hazard model, PD vs. HD<br>HR (95 % CI) |                                                      |
|-----------------------------------------------|--------------------------------------------------------|------------------------------------------------------|
|                                               | during the first 90 days of<br>dialysis                | from 91 days until 3<br>years<br>from first dialysis |
| no added variable                             | 0.50 (0.47, 0.54)                                      | 1.01 (0.97, 1.04)                                    |
| + cause of end-stage renal disease            | 0.50 (0.47, 0.54)                                      | 1.00 (0.97, 1.04)                                    |
| + current smoking                             | 0.50 (0.47, 0.54)                                      | 1.01 (0.97, 1.04)                                    |
| + alcohol dependence                          | 0.50 (0.47, 0.54)                                      | 1.01 (0.97, 1.04)                                    |
| + drug dependence                             | 0.50 (0.47, 0.54)                                      | 1.01 (0.97, 1.04)                                    |
| + geographic region                           | 0.51 (0.47, 0.54)                                      | 1.01 (0.98, 1.05)                                    |
| + inability to ambulate or transfer           | 0.51 (0.47, 0.55)                                      | 1.01 (0.98, 1.05)                                    |
| + count of pre-ESRD visits to<br>nephrologist | 0.52 (0.48, 0.55)                                      | 1.03 (0.99, 1.07)                                    |
| + Medicaid dual eligibility                   | 0.50 (0.47, 0.54)                                      | 1.01 (0.97, 1.05)                                    |
| + body mass index                             | 0.50 (0.47, 0.54)                                      | 1.01 (0.97, 1.05)                                    |
| + hemoglobin                                  | 0.51 (0.47, 0.55)                                      | 1.01 (0.98, 1.05)                                    |
| <b>+ albumin</b>                              | <b>0.53 (0.49, 0.57)</b>                               | <b>1.05 (1.01, 1.09)</b>                             |
| + eGFR at dialysis initiation                 | 0.50 (0.47, 0.54)                                      | 1.00 (0.97, 1.04)                                    |
| + diabetes                                    | 0.50 (0.47, 0.54)                                      | 1.01 (0.97, 1.04)                                    |
| + hypertension                                | 0.50 (0.47, 0.54)                                      | 1.01 (0.97, 1.04)                                    |
| <b>+ heart failure</b>                        | <b>0.53 (0.49, 0.57)</b>                               | <b>1.07 (1.03, 1.11)</b>                             |
| + cardiovascular disease                      | 0.51 (0.48, 0.55)                                      | 1.02 (0.99, 1.06)                                    |
| + cerebral vascular disease                   | 0.51 (0.47, 0.54)                                      | 1.01 (0.98, 1.05)                                    |
| + peripheral vascular disease                 | 0.51 (0.47, 0.55)                                      | 1.02 (0.98, 1.06)                                    |
| + chronic obstructive pulmonary<br>disease    | 0.51 (0.47, 0.55)                                      | 1.02 (0.98, 1.05)                                    |
| + cancer                                      | 0.50 (0.47, 0.54)                                      | 1.01 (0.97, 1.04)                                    |

AF – atrial fibrillation; eGFR – estimated glomerular filtration rate; HD – hemodialysis; PD – peritoneal dialysis.
